# Supplementary material for: Modulating the magnetic properties of MoS2 monolayers by group VIII doping and vacancy engineering
Source: Royal Society of Chemistry journal article supplement (doi:10.1039/c8ra01644e), 2018-01-01
Supplement: c8ra01644e1.pdf [file c8ra01644e1.pdf]

Supporting Information

Table. S1 The magnetic moments with corresponding U values (in  $\mu_B$ ).

|                                      | Fe <sub>U=</sub> | Co <sub>U=</sub> | Ni <sub>U=</sub> | Ru <sub>U=</sub> | Rh <sub>U</sub> | Pd <sub>U=</sub> | Os <sub>U=</sub> | Ir <sub>U=</sub> | Pt <sub>U=</sub> |
|--------------------------------------|------------------|------------------|------------------|------------------|-----------------|------------------|------------------|------------------|------------------|
|                                      | 4eV              | 4eV              | 4eV              | 3eV              | =3.4eV          | 3.9eV            | 2.7eV            | 2.8eV            | 2.9eV            |
|                                      |                  |                  |                  |                  |                 |                  |                  | v                |                  |
| Mo <sub>15</sub> XS <sub>32</sub>    | 2                | 3                | 0                | 2                | 1               | 0                | 2                | 1                | 0                |
| Mo <sub>15</sub> XS <sub>31</sub> -A | 0                | 1                | 0                | 0                | 1               | 0                | 0                | 1                | 0                |
| Mo <sub>15</sub> XS <sub>31</sub> -B | 2                | 3                | 0                | 0                | 1               | 2                | 0                | 1                | 0                |
| Mo <sub>15</sub> XS <sub>31</sub> -C | 2                | 1                | 0                | 0                | 1               | 0                | 2                | 1                | 0                |
| Mo <sub>15</sub> XS <sub>31</sub> -D | 2                | 1                | 0                | 0                | 1               | 0                | 0                | 1                | 0                |
| Mo <sub>15</sub> XS <sub>31</sub> -E | 2                | 3                | 0                | 0                | 1               | 0                | 0                | 1                | 0                |

Table. S2 The energies of non-magnetic states ( $E_{\text{non-magnetic}}$  in eV) and magnetic states ( $E_{\text{magnetic}}$  in eV) of Ni-doped special structure in DFT-PBE and PBE+U.

|                                       | DFT-PBE                   |                                 | PBE+U <sub>U=4eV</sub>    |                                 |
|---------------------------------------|---------------------------|---------------------------------|---------------------------|---------------------------------|
|                                       | $E_{\text{non-magnetic}}$ | $E_{\text{magnetic}}(M=4\mu_B)$ | $E_{\text{non-magnetic}}$ | $E_{\text{magnetic}}(M=4\mu_B)$ |
| Mo <sub>15</sub> NiS <sub>32</sub>    | -337.325                  | -337.126                        | -335.101                  | -334.951                        |
| Mo <sub>15</sub> NiS <sub>31</sub> -B | -330.765                  | -330.424                        | -328.466                  | -328.238                        |
| Mo <sub>15</sub> NiS <sub>31</sub> -C | -330.949                  | -330.594                        | -328.672                  | -328.427                        |
| Mo <sub>15</sub> NiS <sub>31</sub> -E | -330.633                  | -330.425                        | -328.406                  | -328.244                        |
